# Supplementary material for: A chromosome-scale assembly reveals chromosomal aberrations and exchanges generating genetic diversity in Coffea arabica germplasm
Source: PubMed Central journal article supplement (PMC10805892; doi:10.1038/s41467-023-44449-8), 2024-01-23
Supplement: 41467_2023_44449_MOESM3_ESM.pdf [file 41467_2023_44449_MOESM3_ESM.pdf]

### Description of Additional Supplementary Files

File Name: Supplementary Data 1

Description: Resequencing data obtained from public repositories.

File Name: Supplementary Data 2

Description: Gene ontology enrichment analysis in the chromosome segments of *C. arabica* that tend to be replaced by Timor hybrid-derived haplotypes in Timor hybrid derivatives.

File Name: Supplementary Data 3

Description: GBS data obtained from public repositories (BioProject number PRJNA554647).

File Name: Supplementary Data 4

Description: *C. arabica* accessions showing large (>1 Mb) deletions or duplications.

File Name: Supplementary Data 5

Description: *C. arabica* accessions showing homoeologous exchanges.

File Name: Supplementary Data 6

Description: Characterisation of the exchanged homoeologous chromosomal segments, from the homoeologous exchange (HE) site to the nearest telomeric end, and of the region spanning HE sites (1-Mbp interval around the approximate location of each HE event).

File Name: Supplementary Data 7

Description: Gene ontology enrichment analysis in exchanged homoeologous chromosomal segments (from the site of homoeologous exchange to the nearest telomeric end).
